# Supplementary material for: The Role of Housing Environment and Dietary Protein Source on the Gut Microbiota of Chicken
Source: MDPI journal article supplement (doi:10.3390/ani9121085), 2019-12-05
Supplement: s1 [file s1]

Supplementary Table 1: Table of the nutritional compositions of the experimental diets used in this study. The table is extracted from the published paper by Ajeeli et al, 2017 (Poultry Science).

**Table 1.** Composition and nutrient levels of corn/soybean and corn/soybean-free diets from 19 to 55 wk of age.

| Ingredients                                | Soybean%<br>19 to 38 wk  | Soybean free%<br>19 to 38 wk | Soybean%<br>39 to 44 wk   | Soybean free%<br>39 to 44 wk |
|--------------------------------------------|--------------------------|------------------------------|---------------------------|------------------------------|
| Corn                                       | 64.11                    | 46.99                        | 65.25                     | 42.85                        |
| Dehulled soybean meal                      | 20.04                    | -                            | 21.07                     | -                            |
| Cottonseed meal                            | -                        | 14.94                        | -                         | 15.00                        |
| Corn gluten meal                           | 0.38                     | 1.38                         | 0.31                      | 1.63                         |
| Corn dried distiller grains with solubles  | -                        | 15.00                        | -                         | 15                           |
| Wheat midds                                | -                        | 3.59                         | -                         | 8.65                         |
| DL-Methionine 98%                          | 0.35                     | 0.36                         | 0.17                      | 0.18                         |
| L-Threonine 98%                            | -                        | 0.03                         | -                         | 0.05                         |
| Lysine HCL                                 | 0.24                     | 0.66                         | -                         | 0.42                         |
| Fat—animal-vegetable blend <sup>5</sup>    | 2.75                     | 4.73                         | 1.76                      | 4.75                         |
| Limestone                                  | 9.76                     | 9.92                         | 9.45                      | 9.62                         |
| Mono-Dical PO4                             | 1.66                     | 1.65                         | 1.32                      | 1.27                         |
| Salt                                       | 0.29                     | -                            | 0.38                      | 0.06                         |
| Sodium bicarbonate                         | 0.12                     | 0.44                         | -                         | 0.23                         |
| Trace minerals <sup>1</sup>                | 0.05                     | 0.05                         | 0.05                      | 0.05                         |
| Vitamins <sup>2</sup>                      | 0.25                     | 0.25                         | 0.25                      | 0.25                         |
| <b>Calculated nutrient composition (%)</b> |                          |                              |                           |                              |
| ME(kcal/kg)                                | 2911                     | 2911                         | 2867                      | 2867                         |
| Crude protein                              | 16.5 (15.5) <sup>4</sup> | 16.5 (16.2) <sup>4</sup>     | 16.75(14.96) <sup>4</sup> | 16.75(17.16) <sup>4</sup>    |
| Crude fat                                  | 4.58                     | 7.36                         | 3.62                      | 7.43                         |
| Crude fiber                                | 1.71 (2.6) <sup>4</sup>  | 4.18 (5.7) <sup>4</sup>      | 1.76(3.06) <sup>4</sup>   | 4.51(8.56) <sup>4</sup>      |
| Calcium                                    | 4.08                     | 4.08                         | 3.91                      | 3.91                         |
| Phosphorous                                | 0.68                     | 0.78                         | 0.62                      | 0.73                         |
| Available phosphate                        | 0.45                     | 0.45                         | 0.38                      | 0.38                         |
| Digestible methionine <sup>3</sup>         | 0.58                     | 0.58                         | 0.41                      | 0.40                         |
| Digestible lysine <sup>3</sup>             | 0.90 (1.0) <sup>4</sup>  | 0.90 (0.99) <sup>4</sup>     | 0.74(0.79) <sup>4</sup>   | 0.73(0.90) <sup>4</sup>      |
| Digestible TSAA <sup>3</sup>               | 0.80                     | 0.80                         | 0.64                      | 0.63                         |
| Xanthophyll (mg/kg)                        | 12                       | 12                           | 12                        | 12                           |
| Electrolytes (meq/kg)                      | 170                      | 170                          | 170                       | 170                          |
| Sodium                                     | 0.17                     | 0.20                         | 0.20                      | 0.20                         |
| Chloride                                   | 0.26                     | 0.18                         | 0.17                      | 0.17                         |

<sup>1</sup>Trace minerals premix added at this rate yields (mg/kg): zinc, 60.0; manganese, 60.0; iron, 60.0; copper, 7.0; iodine, 0.4.

<sup>2</sup>Vitamin premix added at this rate yields (per kg): vitamin A, 11 IU; vitamin D<sub>3</sub>, 3850 IU; vitamin E, 45.8 IU; menadione, 1.5 mg; B<sub>12</sub>, 0.017 mg; biotin, 0.55 mg; thiamine, 2.93 mg; riboflavin, 5.96 mg; d-pantothenic acid, 20.17 mg; B<sub>6</sub>, 7.15 mg; niacin, 45.8 mg; folic acid, 1.74 mg; choline, 130.3 mg.

Standardized digestibility coefficients for cottonseed methionine, lysine, and TSAA were 0.73, 0.67, and 0.73.

<sup>4</sup>Nutrient analysis was performed by Experiment Station Chemical Laboratory, University of Missouri.

<sup>5</sup>Griffin Industries, Bastrop TX.
